# Supplementary material for: Bifunctional acid–base mesoporous silica@aqueous miscible organic-layered double hydroxides
Source: PubMed Central journal article supplement (PMC9060557; doi:10.1039/c9ra00188c), 2019-01-28
Supplement: RA-009-C9RA00188C-s001.pdf [file RA-009-C9RA00188C-s001.pdf]

Electronic Supplementary material (ESI)

**Bifunctional acid-base mesoporous silica@aqueous miscible  
organic-layered double hydroxides**

Hongri Suo, Haohong Duan, Chunping Chen, Jean-Charles Buffet and Dermot O'Hare

Chemistry Research Laboratory, Department of Chemistry, University of Oxford,

12 Mansfield Road, Oxford, OX1 3TA, UK.

E-mail: Dermot.ohare@chem.ox.ac.uk

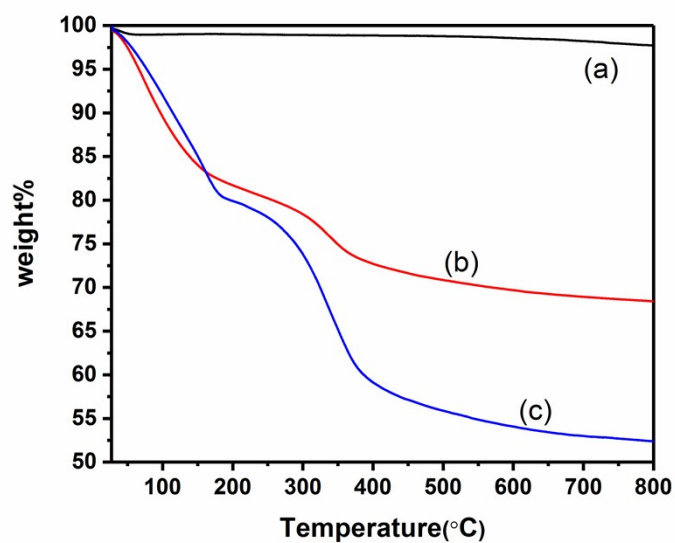

**Fig. S1.** TGA of (a) MCM-41, (b) MCM-41@AMO-Mg<sub>3</sub>Al-CO<sub>3</sub>-LDH and (c) AMO-Mg<sub>3</sub>Al-CO<sub>3</sub>-LDH (in the range of 30–800 °C).

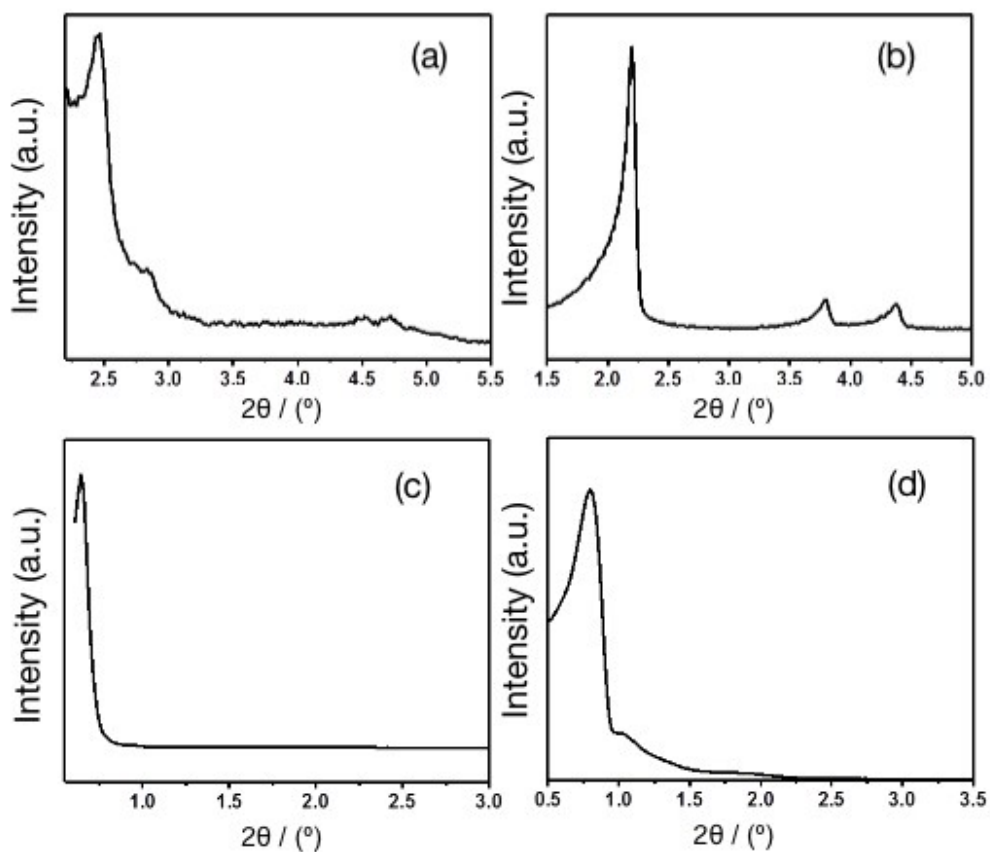

**Fig. S2.** Low angle XRD patterns for different MSN nanoparticles as the core materials: (a) MCM-48@AMO-Mg<sub>3</sub>Al-CO<sub>3</sub>-LDH, (b) MCM-41@AMO-Mg<sub>3</sub>Al-CO<sub>3</sub>-LDH, (c) SBA-15@AMO-Mg<sub>3</sub>Al-CO<sub>3</sub>-LDH and (d) P-SBA-15@AMO-Mg<sub>3</sub>Al-CO<sub>3</sub>-LDH.

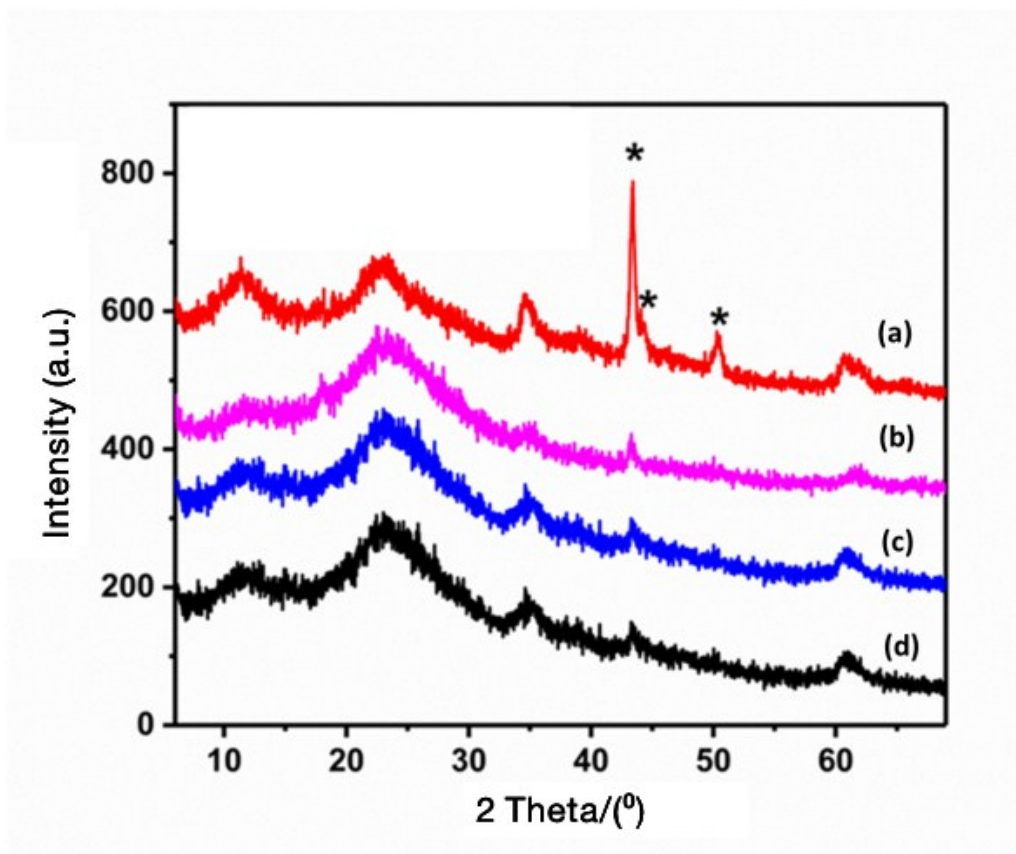

**Fig. S3.** High angle XRD patterns for different MSN nanoparticles as the core materials: (a) MCM-48@AMO-Mg<sub>3</sub>Al-CO<sub>3</sub>-LDH, (b) MCM-41@AMO-Mg<sub>3</sub>Al-CO<sub>3</sub>-LDH, (c) SBA-15@AMO-Mg<sub>3</sub>Al-CO<sub>3</sub>-LDH and (d) P-SBA-15@AMO-Mg<sub>3</sub>Al-CO<sub>3</sub>-LDH (\* is the signal of sample holder).

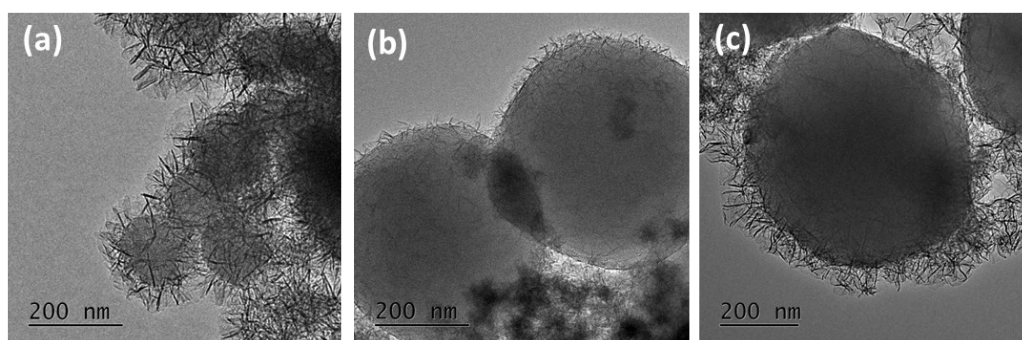

**Fig. S4.** TEM image of MSN@AMO-MgAl-CO<sub>3</sub>-LDH with different diameter core and different Mg/Al (a) 150 nm-MCM-41@AMO-Mg<sub>3</sub>Al-CO<sub>3</sub>-LDH (70% AMO-LDH), (b) 600 nm-MCM-41@AMO-Mg<sub>2</sub>Al-CO<sub>3</sub>-LDH (54% AMO-LDH) and (c) 600 nm-MCM-41@AMO-Mg<sub>3</sub>Al-CO<sub>3</sub>-LDH (63% AMO-LDH). The weight percentage of AMO-LDH was calculated from TGA data.

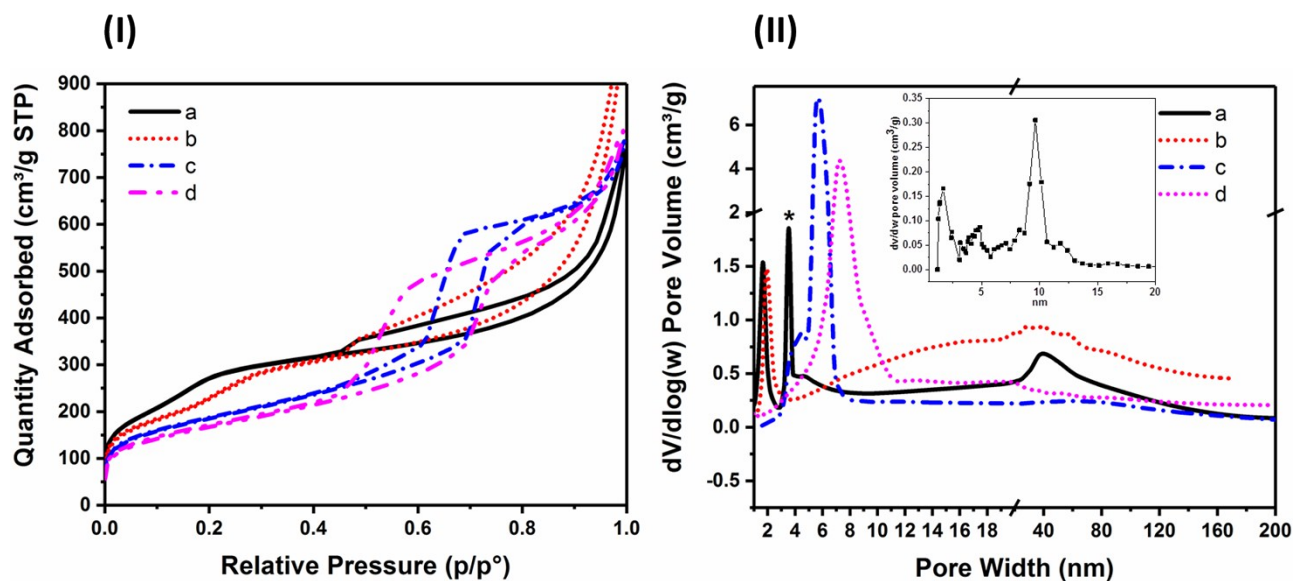

**Fig. S5.** (I)  $N_2$  adsorption-desorption isotherm and (II) BJH pore size distribution of MSN@AMO- $Mg_3Al$ - $CO_3$ -LDH by using different MSN nanoparticles as the core materials: (a) MCM-48@AMO- $Mg_3Al$ - $CO_3$ -LDH, (b) MCM-41@AMO- $Mg_3Al$ - $CO_3$ -LDH, (c) SBA-15@AMO- $Mg_3Al$ - $CO_3$ -LDH and (d) P-SBA-15@AMO- $Mg_3Al$ - $CO_3$ -LDH. The insert picture is the pore size distributions of SBA-15-PVA@AMO- $Mg_3Al$ -LDH obtained by NLDFT method and the \* is the tensile strength effect.

**Table S1.** Silicon environment in MCM-41 and MCM-41@AMO- $Mg_3Al$ - $CO_3$ -LDH determined by  $^{29}Si$  solid state NMR spectroscopy.

| MCM-41                                | $\delta$ (ppm) | Assignment                                                                                | Percentage (%) |
|---------------------------------------|----------------|-------------------------------------------------------------------------------------------|----------------|
| 1                                     | -101           | Q3 (SiO) $_3$ SiOH                                                                        | 68             |
| 2                                     | -110           | Q4 (SiO) $_4$ Si                                                                          | 32             |
| MCM41@<br>AMO- $Mg_3Al$ - $CO_3$ -LDH | $\delta$ (ppm) | Assignment                                                                                | Percentage (%) |
| 1                                     | -77.5          | Q2 (SiO) $_2$ Si(OH) $_2$ ,<br>Q3(SiO) $_2$ (AlO)SiOH,<br>Q4Si(3Al), Q4Si(2Al), Q4Si(1Al) | 11.8           |
| 2                                     | -85            |                                                                                           | 6.2            |
| 3                                     | -91            |                                                                                           | 6.5            |
| 4                                     | -100           | Q3 (SiO) $_3$ SiOH                                                                        | 32             |
| 5                                     | -108           | Q4 (SiO) $_4$ Si                                                                          | 23             |
| 6                                     | -113.8         | Cristobalite                                                                              | 18.5           |
| 7                                     | -117.8         | Cristobalite                                                                              | 1.3            |

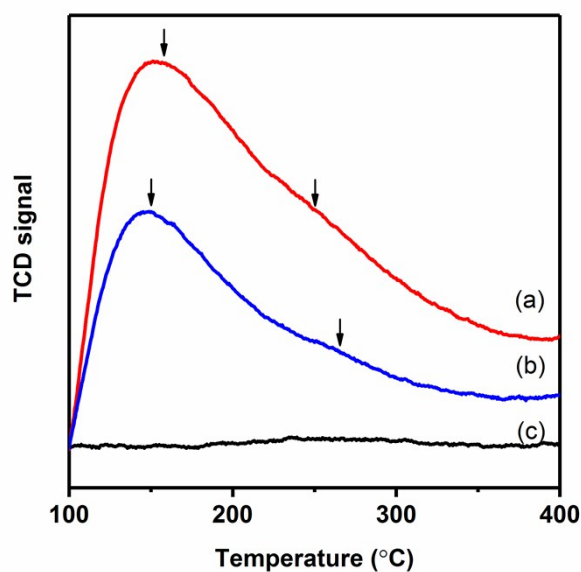

**Fig S6.** NH<sub>3</sub> TPD of (a) MCM-41, (b) MCM-41@AMO-Mg<sub>3</sub>Al-CO<sub>3</sub>-LDH and (c) CO<sub>2</sub> TPD of MCM-41@AMO-Mg<sub>3</sub>Al-CO<sub>3</sub>-LDH (in the range of 100 – 400 °C).

**Table S2.** Acidity / basicity quantitative evaluation of MCM-41, AMO-Mg<sub>3</sub>Al-CO<sub>3</sub>-LDH and composite MCM-41@AMO-Mg<sub>3</sub>Al-CO<sub>3</sub>-LDH by CO<sub>2</sub>/NH<sub>3</sub>-Temperature programmed desorption (TPD) measurement.

| Acidity                                                    | Acid site     | Amount (mmol/g)            |
|------------------------------------------------------------|---------------|----------------------------|
| MCM-41                                                     | weak          | 0.0184                     |
| AMO-Mg <sub>3</sub> Al-CO <sub>3</sub> -LDH<br>(Mg/Al=3:1) | -             | 0.00 (after calibration)   |
| MCM-41@AMO-Mg <sub>3</sub> Al-CO <sub>3</sub> -LDH         | weak+moderate | 0.3380 (after calibration) |
| Alkalinity                                                 | Basic site    | Amount (mmol/g)            |
| MCM-41                                                     | -             | 0.006(after calibration)   |
| AMO-Mg <sub>3</sub> Al-CO <sub>3</sub> -LDH<br>(Mg/Al=3:1) | weak+moderate | 0.4993 (after calibration) |
| MCM-41@AMO-Mg <sub>3</sub> Al-CO <sub>3</sub> -LDH         | weak+moderate | 0.2875 (after calibration) |
